# Supplementary figures and images for: Visualizing stromal cell dynamics in different tumor microenvironments by spinning disk confocal microscopy
Source: Oxford University Press journal article supplement (doi:10.1242/dmm.000596), 2008-09-19

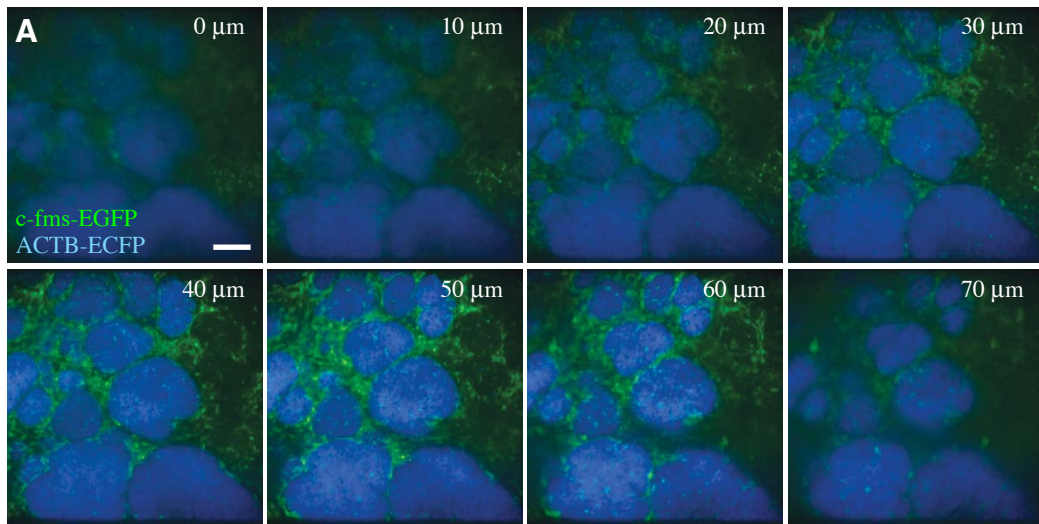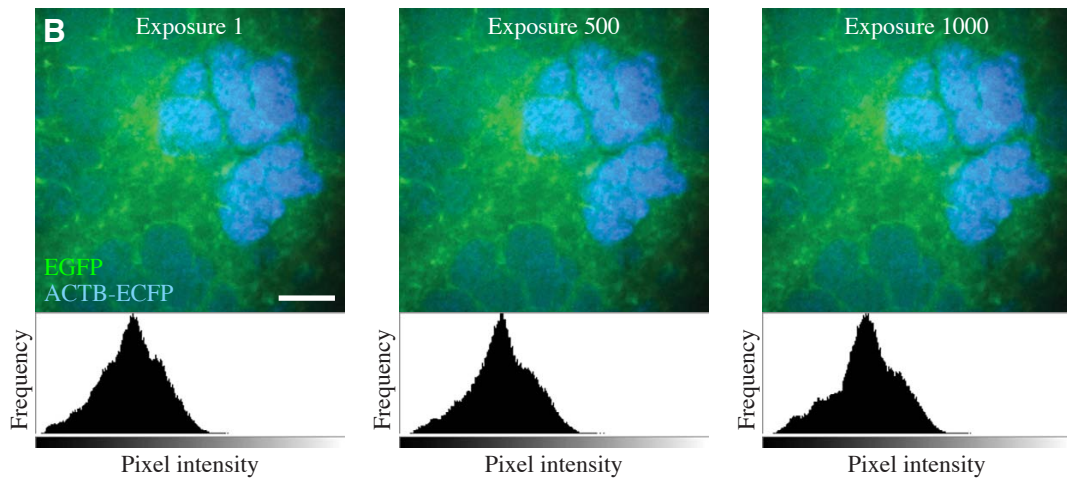

Supplement: dmm000596-sup-000596-figs3.pdf [file dmm000596-sup-000596-figs3.pdf]
